# Supplementary material for: Stem Growth of Horse Chestnut (Aesculus hippocastanum L.) under a Warming Climate—Tree Age Matters
Source: MDPI journal article supplement (doi:10.3390/f13101677), 2022-10-12
Supplement: s1 [file s1]

Archive with 5 entries (5 files):
- Figure S1. Monthly_temp_and_precip_to_norm.pdf
- Figure S2. Growing_season_boxplots.pdf
- Figure S3. GS_lenght_end.pdf
- Table S1. GRO_TWD_BAI_stat.pdf
- Table S2. GLMM.pdf
