# Supplementary material for: Stem Growth of Horse Chestnut (Aesculus hippocastanum L.) under a Warming Climate—Tree Age Matters
Source: MDPI journal article supplement (doi:10.3390/f13101677), 2022-10-12
Supplement: s1 [file s1 › Figure S1. Monthly_temp_and_precip_to_norm.pdf]

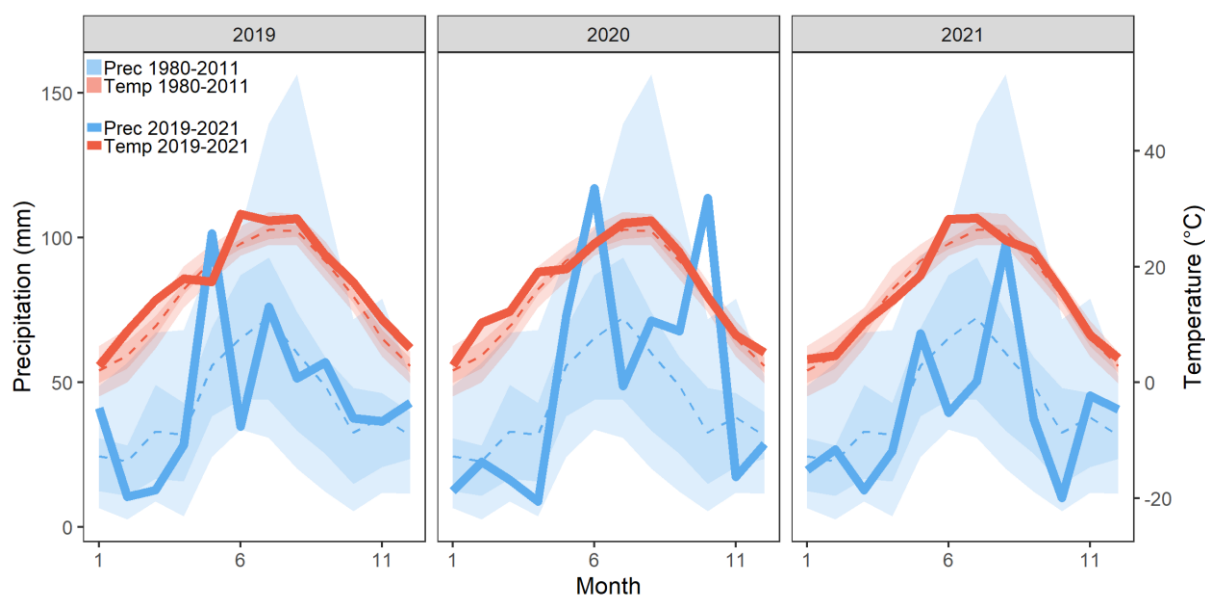

**Figure S1.** The average monthly mean temperature (red color) and monthly precipitation totals (blue color) for the period 1980-2011. Dashed line shows average, darker colored area is 50% quantile and lighter colored area is 95% quantile. Thick solid lines prescribe the temperature and precipitation during the studied period 2019-2021.

Data adopted from Czech Hydrometeorological Institute Available online: <https://www.chmi.cz/> (accessed on 1 July 2022).
