# Supplementary material for: Stem Growth of Horse Chestnut (Aesculus hippocastanum L.) under a Warming Climate—Tree Age Matters
Source: MDPI journal article supplement (doi:10.3390/f13101677), 2022-10-12
Supplement: s1 [file s1 › Figure S2. Growing_season_boxplots.pdf]

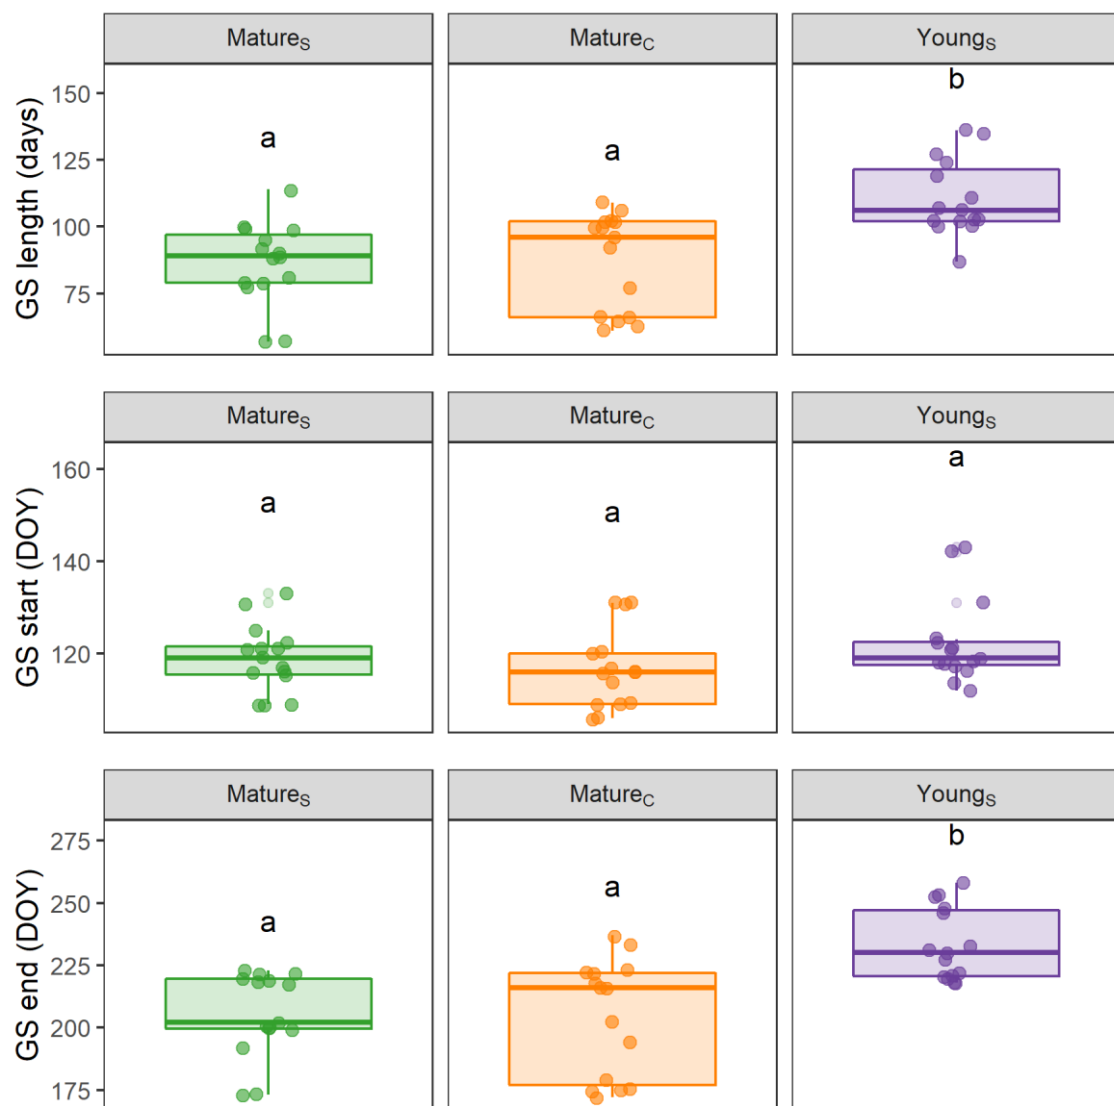

**Figure S2.** Boxplots with median and interquartile range for average growing season (GS) length, start and end of studied tree groups. Different letters show statistical difference among tree groups assessed using generalized linear models (GLM) followed by Tukey's honestly significant difference (HSD) test.
