# Supplementary material for: Stem Growth of Horse Chestnut (Aesculus hippocastanum L.) under a Warming Climate—Tree Age Matters
Source: MDPI journal article supplement (doi:10.3390/f13101677), 2022-10-12
Supplement: s1 [file s1 › Figure S3. GS_lenght_end.pdf]

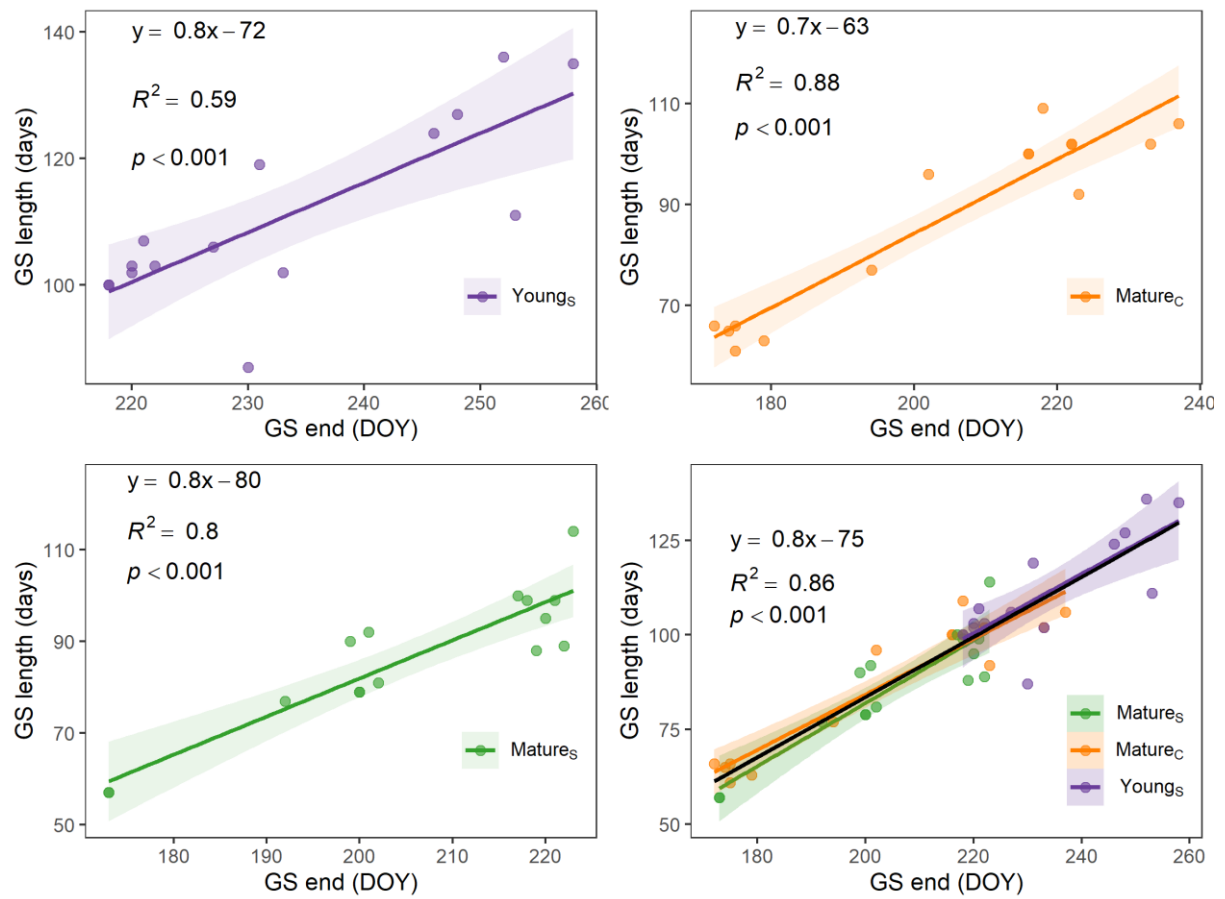

**Figure S3.** Linear relationships between growing season (GS) length and end of studied tree groups separately and together.
