# Supplementary material for: Stem Growth of Horse Chestnut (Aesculus hippocastanum L.) under a Warming Climate—Tree Age Matters
Source: MDPI journal article supplement (doi:10.3390/f13101677), 2022-10-12
Supplement: s1 [file s1 › Table S1. GRO_TWD_BAI_stat.pdf]

**Table S1.** Statistical significance presented as p-values derived from Tukey's honestly significant difference (HSD) test following the linear mixed effect models (LME) to assess difference in total year basal area increment (BAI), stem radius increment (GRO) and tree water deficit indicator (TWD) between individual tree groups. Significance also indicated as \*\*\*p<0.001, \*p<0.05.

|     | MATURE <sub>s</sub> - MATURE <sub>c</sub> | YOUNG <sub>s</sub> -MATURE <sub>c</sub> | YOUNG-MATURE <sub>s</sub> |
|-----|-------------------------------------------|-----------------------------------------|---------------------------|
| GRO | 0.712                                     | <0.001***                               | <0.001***                 |
| BAI | 0.0618                                    | 0.0132*                                 | 0.8401                    |
| TWD | <0.001***                                 | 0.0137*                                 | <0.001***                 |
