# Supplementary material for: Stem Growth of Horse Chestnut (Aesculus hippocastanum L.) under a Warming Climate—Tree Age Matters
Source: MDPI journal article supplement (doi:10.3390/f13101677), 2022-10-12
Supplement: s1 [file s1 › Table S2. GLMM.pdf]

**Table S2.** Output of the generalized mixed effect models (GLMM) of monthly data of growing rates (GRO) and tree water deficit indicator (TWD) as response variables and mean global radiation (GR), air temperature (T), vapor pressure deficit (VPD), precipitation totals (Prec) and water table depth (Depth) as fixed effects and years nested in trees as the random effects. Presented are estimates  $\pm$  standard errors. Significance is indicated as \*\*\* $p < 0.001$ , \*\* $p < 0.01$ , \* $p < 0.05$ , '-' n.s.

| Response variable:      | <b>GRO</b>         |                     |                     |       |
|-------------------------|--------------------|---------------------|---------------------|-------|
|                         | YOUNG <sub>s</sub> | MATURE <sub>c</sub> | MATURE <sub>s</sub> |       |
| GR                      | 4.6 $\pm$ 0.4***   | 9.9 $\pm$ 1.8***    | 10.4 $\pm$ 2.7***   |       |
| T                       | -                  | -10.2 $\pm$ 2.1***  | -9.2 $\pm$ 2.9**    |       |
| VPD                     | 3.1 $\pm$ 0.4***   | 12.7 $\pm$ 2.3***   | 10.2 $\pm$ 2.9***   |       |
| Prec                    | 2.8 $\pm$ 0.2***   | 9.5 $\pm$ 1.6***    | 9.1 $\pm$ 2.2***    |       |
| Depth                   | -                  | -3.8 $\pm$ 1.3**    | -4.8 $\pm$ 1.5**    |       |
| Marginal R <sup>2</sup> |                    | 0.893               | 0.957               | 0.978 |
| N observations          |                    | 70                  | 70                  | 75    |
| N Years:trees           |                    | 15                  | 15                  | 15    |
| N Trees                 |                    | 5                   | 5                   | 5     |

  

| Response variable:      | <b>TWD</b>         |                     |                     |       |
|-------------------------|--------------------|---------------------|---------------------|-------|
|                         | YOUNG <sub>s</sub> | MATURE <sub>c</sub> | MATURE <sub>s</sub> |       |
| GR                      | 4.2 $\pm$ 1.4**    | -                   | 11.5 $\pm$ 2.8***   |       |
| Ta                      | -                  | -9.6 $\pm$ 2.9***   | 3 $\pm$ 1.5*        |       |
| VPD                     | -4.6 $\pm$ 1.3***  | 8.5 $\pm$ 2.9**     | -14.2 $\pm$ 3.1***  |       |
| Prec                    | -                  | 3.9 $\pm$ 1.7*      | -                   |       |
| Depth                   | 10.1 $\pm$ 1.9***  | -                   | 14.8 $\pm$ 3.1***   |       |
| Marginal R <sup>2</sup> |                    | 0.941               | 0.668               | 0.962 |
| N observations          |                    | 75                  | 75                  | 75    |
| N Years:trees           |                    | 15                  | 15                  | 15    |
| N Trees                 |                    | 5                   | 5                   | 5     |
